# Supplementary material for: Right Cortical Infarction and a Reduction in Putamen Volume May Be Correlated with Empathy in Patients after Subacute Ischemic Stroke—A Multimodal Magnetic Resonance Imaging Study
Source: MDPI journal article supplement (doi:10.3390/jcm11154479), 2022-07-31

Supplemental Data: Putaminal volumes of quantitative images and corresponding result of EQ for each patient

Subject 1 Putamen volume = 10.3ml EQ = 19

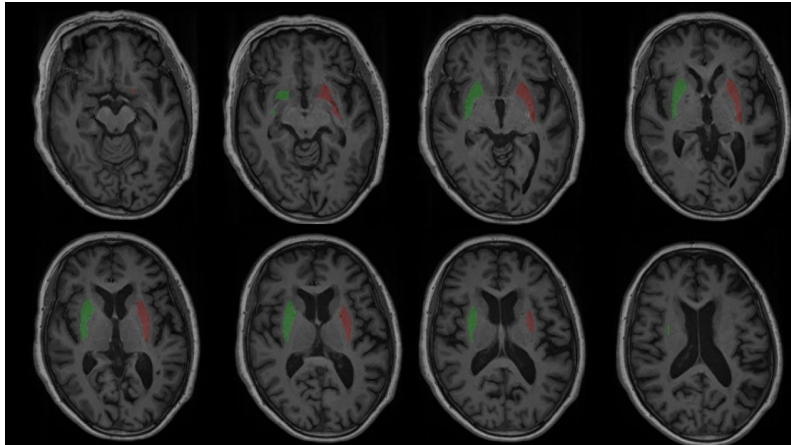

Subject 2 Putamen volume = 9.92ml EQ = 52

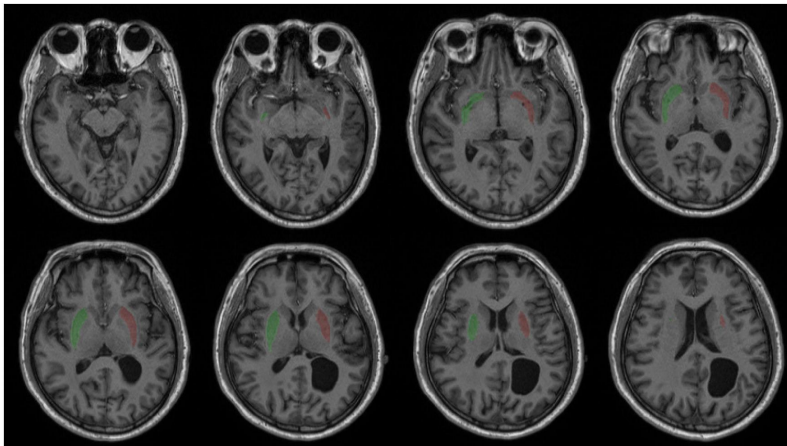

Subject 3 Putamen volume = 11.6ml EQ = 57

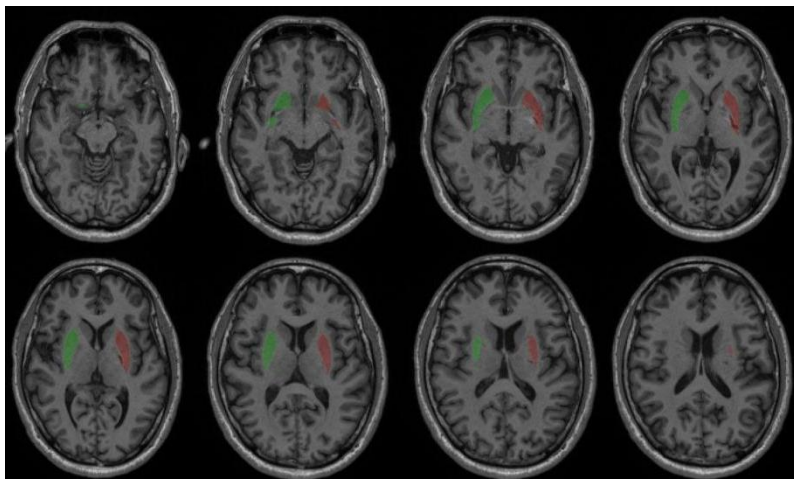

Subject 4 Putamen volume = 11.2ml EQ = 51

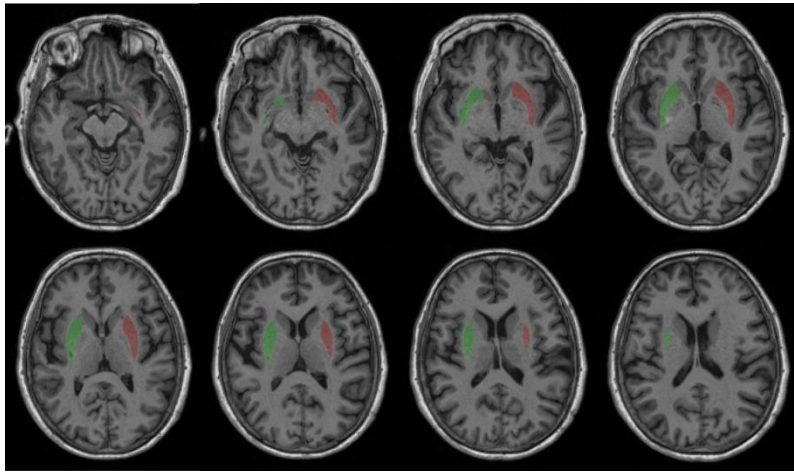

Subject 5 Putamen volume = 10.6ml EQ = 60

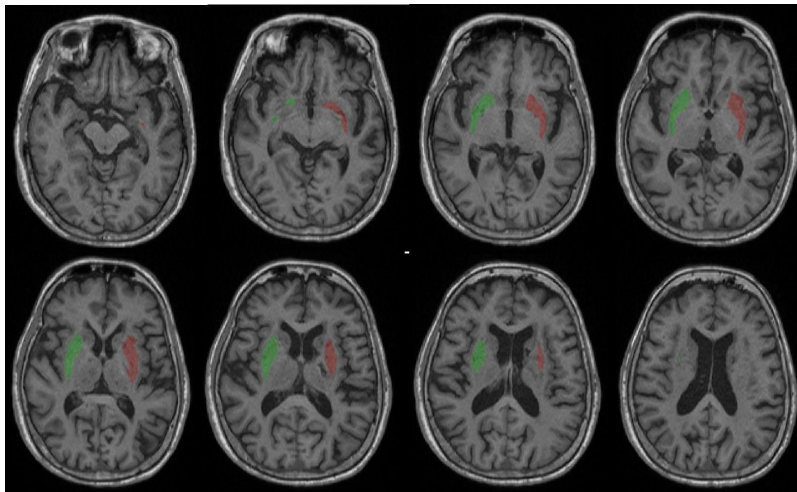

Subject 6 Putamen volume = 11.6ml EQ = 73

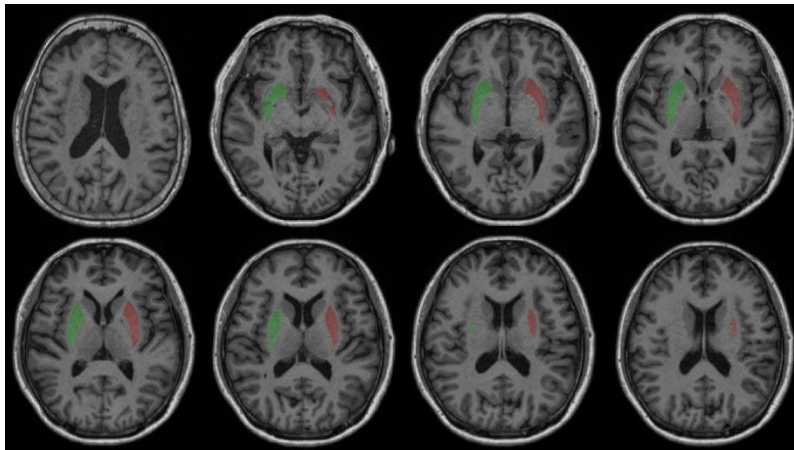

Subject 7 Putamen volume = 10.9ml EQ = 44

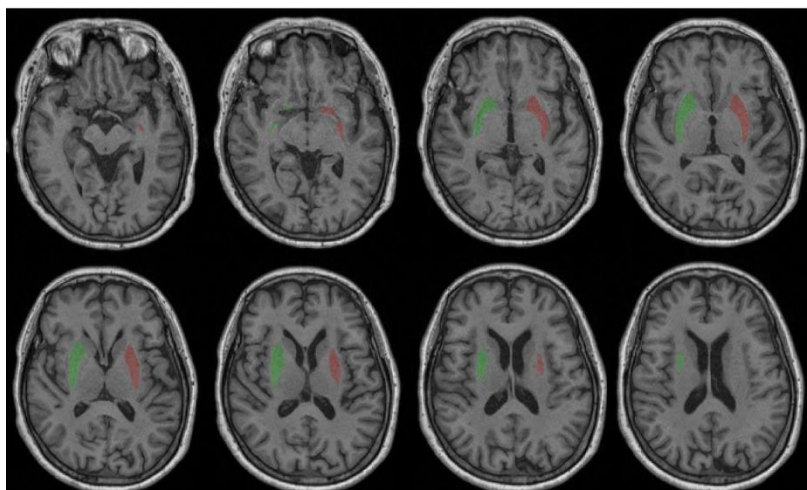

Subject 8 Putamen volume = 10.2ml EQ = 31

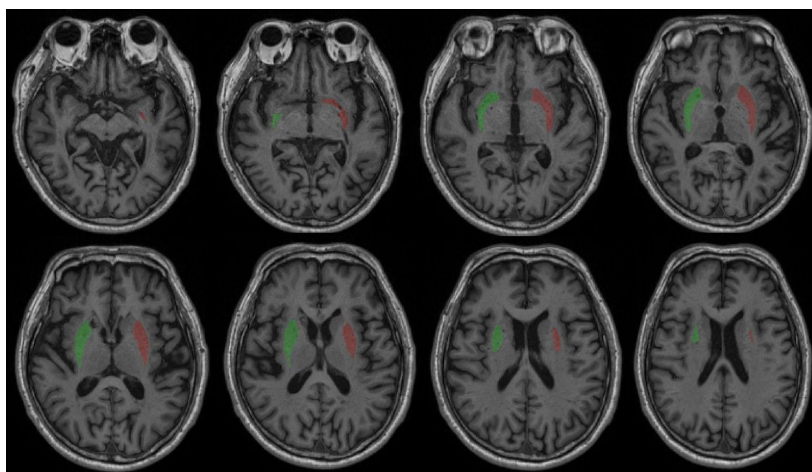

Subject 9 Putamen volume = 10.1ml EQ = 50

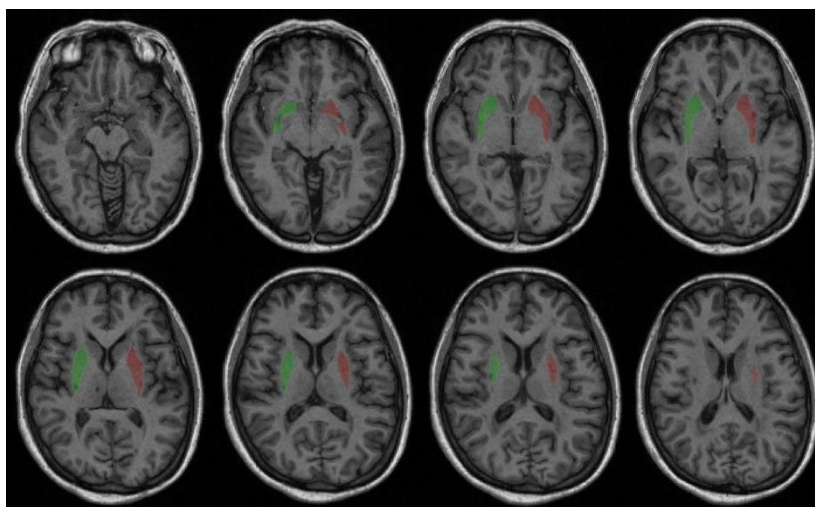



Subject 10     Putamen volume = 11.7ml     EQ = 57

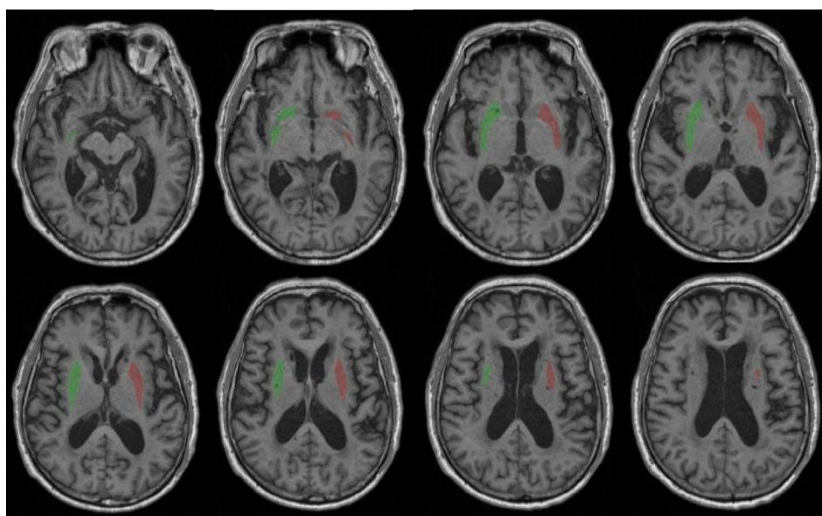

Subject 11     Putamen volume = 10ml     EQ = 47

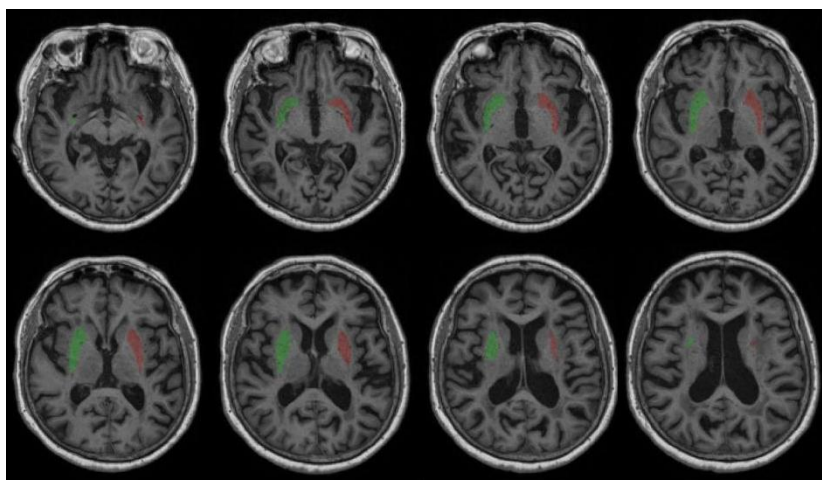

Subject 12     Putamen volume = 10ml     EQ = 33

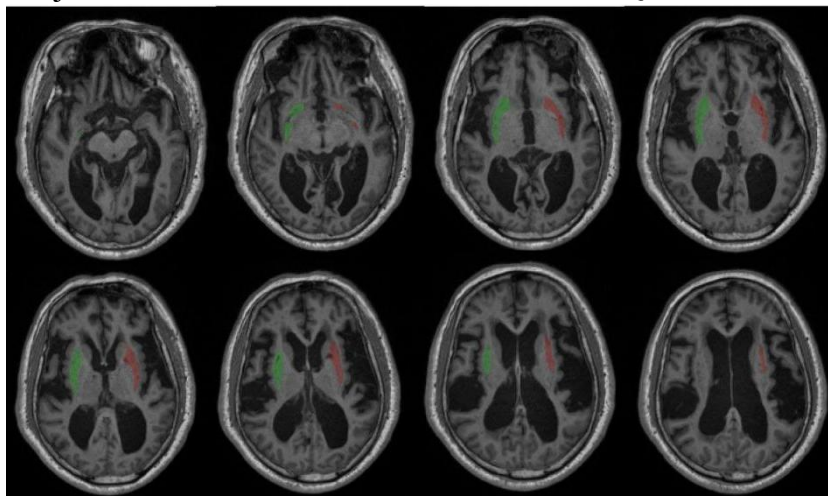

Subject 13      Putamen volume = 10.3ml      EQ = 24

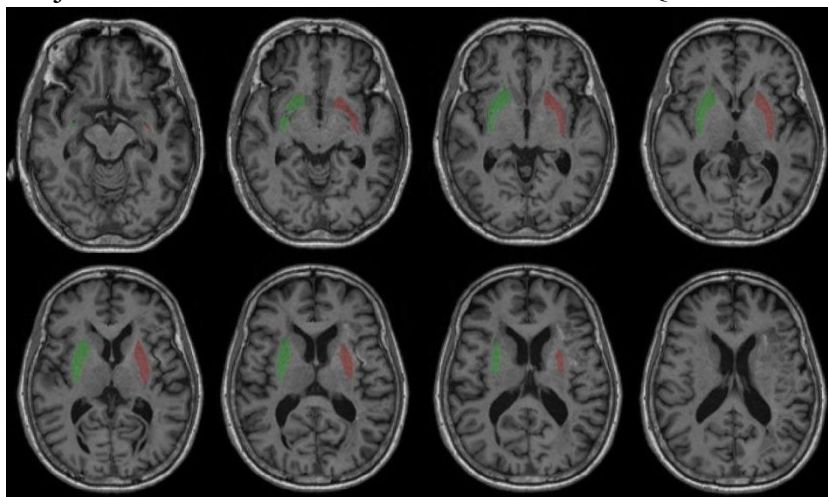

Subject 14      Putamen volume = 8.1ml      EQ = 20

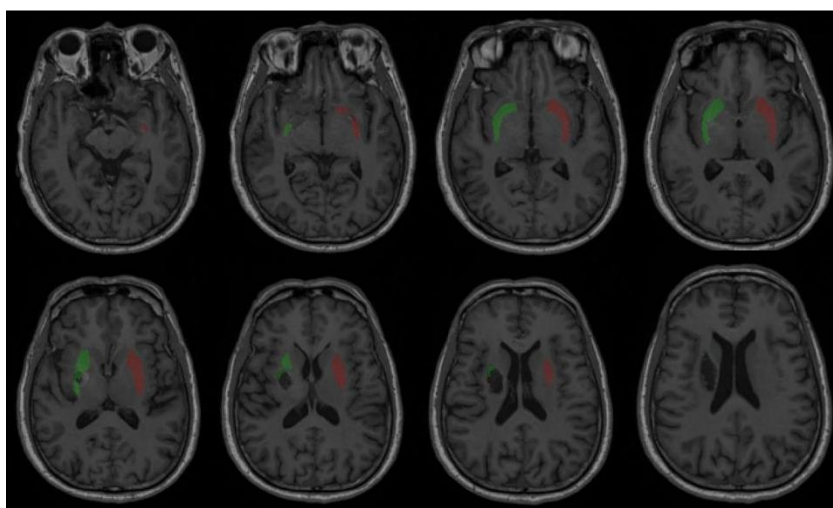

Subject 15      Putamen volume = 11.3ml      EQ = 30

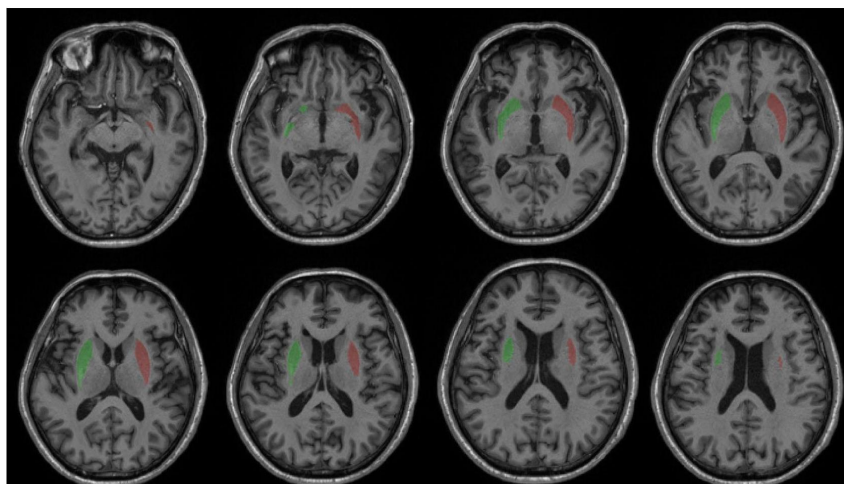

Subject 16 Putamen volume = 11.8ml EQ = 33

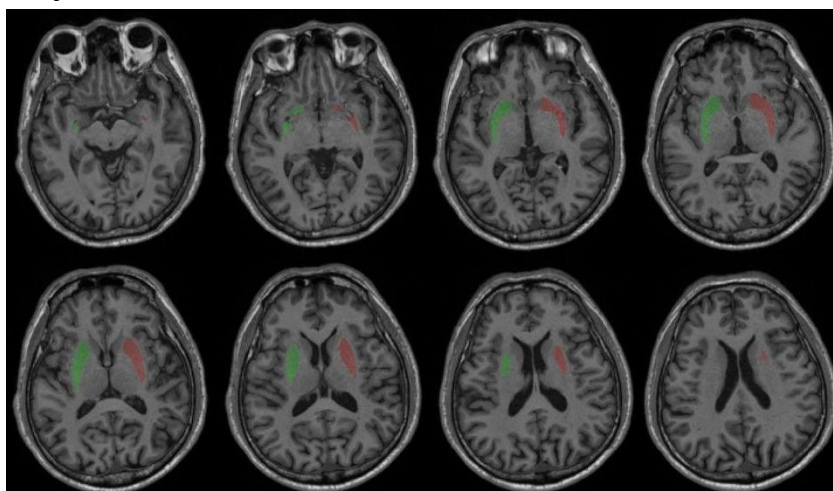

Subject 17 Putamen volume = 10.2ml EQ = 31

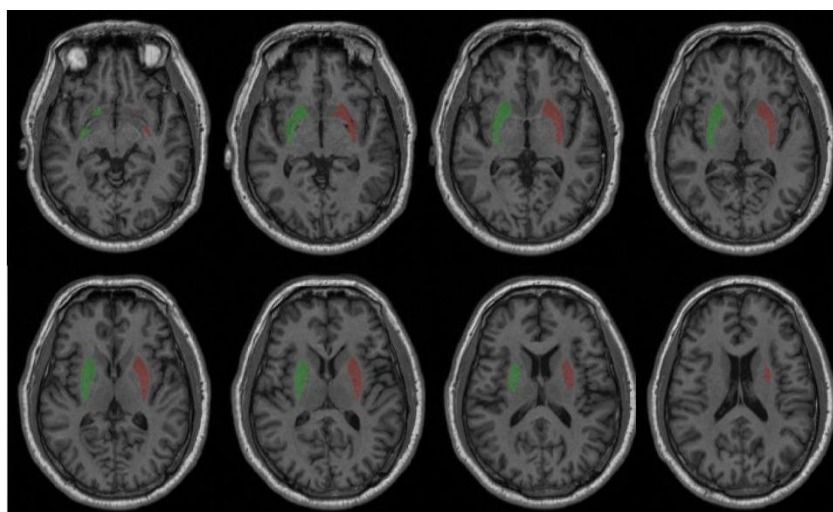

Subject 18 Putamen volume = 10.7ml EQ = 36

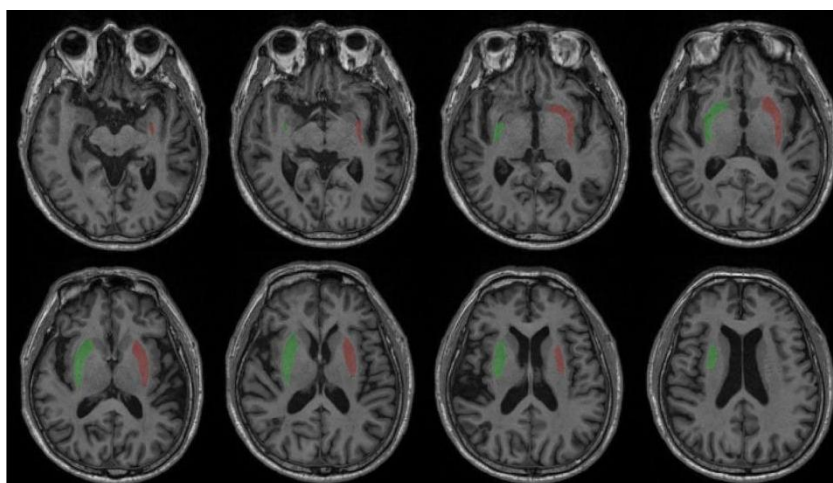



Subject 19 Putamen volume = 10.6ml EQ = 50

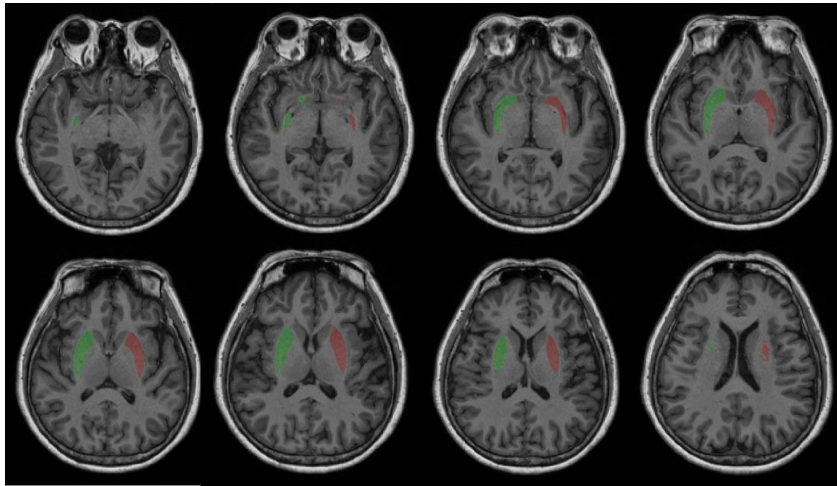

Subject 20 Putamen volume = 10ml EQ = 45

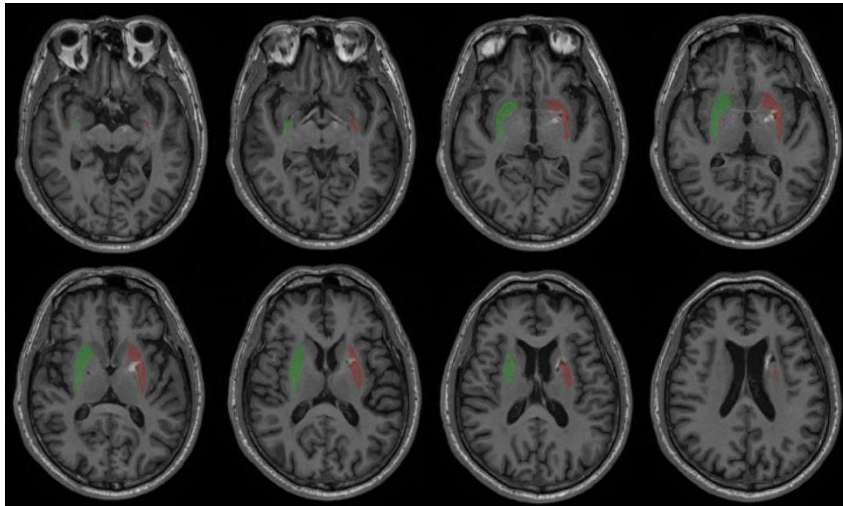

Subject 21 Putamen volume = 11.4ml EQ = 39

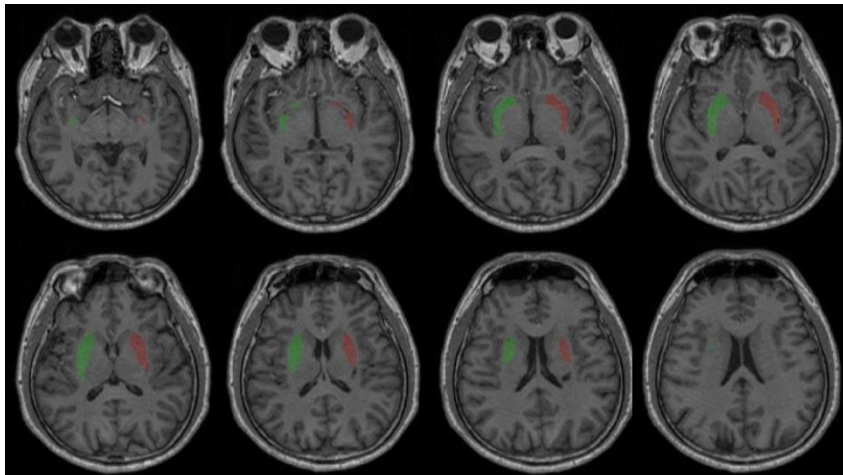

Subject 22 Putamen volume = 8.73ml EQ = 38

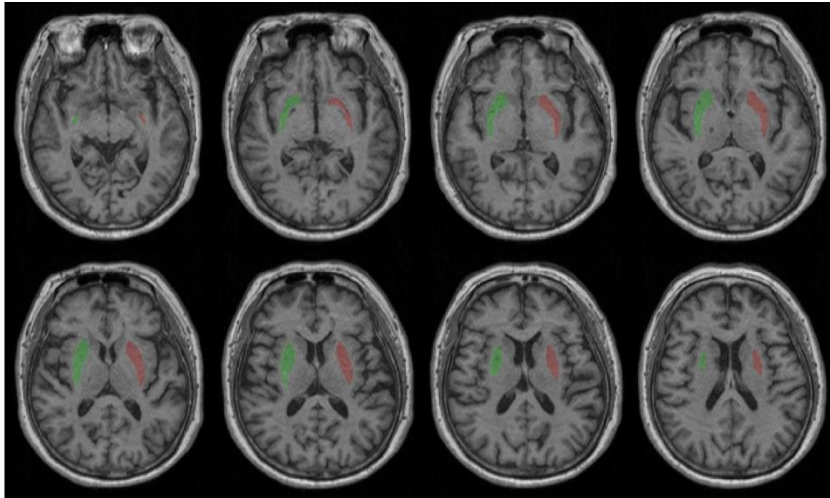

Subject 23 Putamen volume = 10.8ml EQ = 39

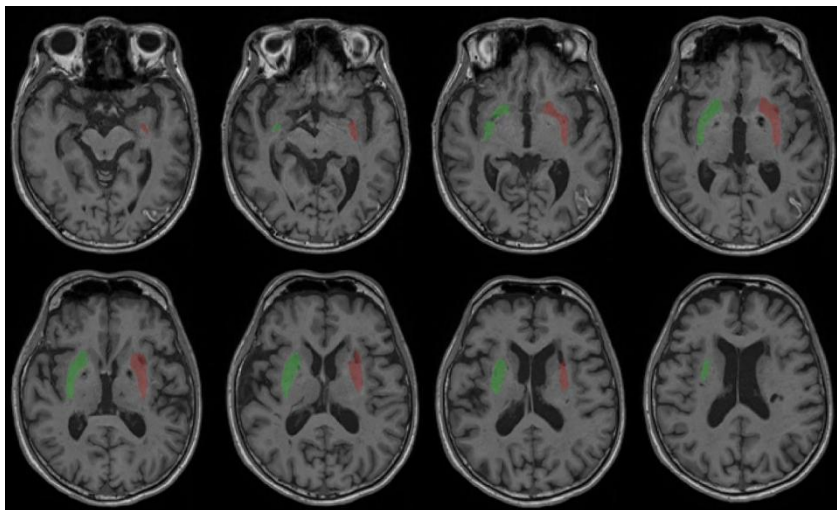

Subject 24 Putamen volume = 5.53ml EQ = 23

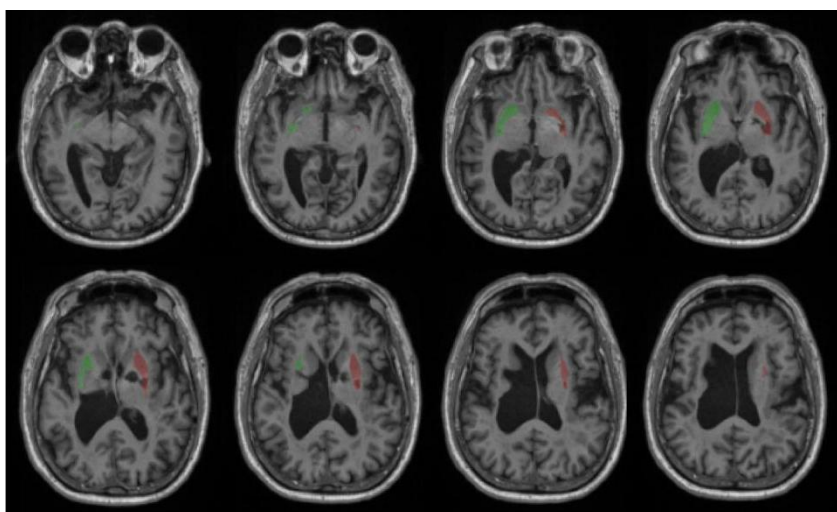



Subject 25     Putamen volume = 10.9ml     EQ = 46

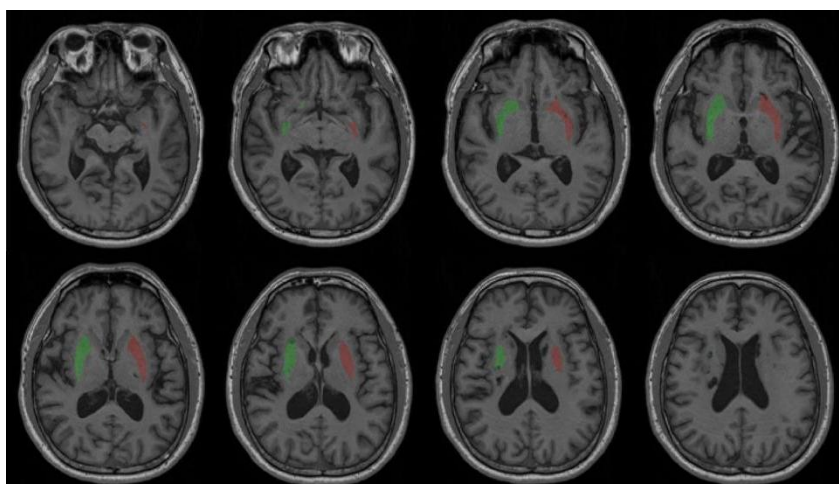

Subject 26     Putamen volume = 12.9ml     EQ = 20

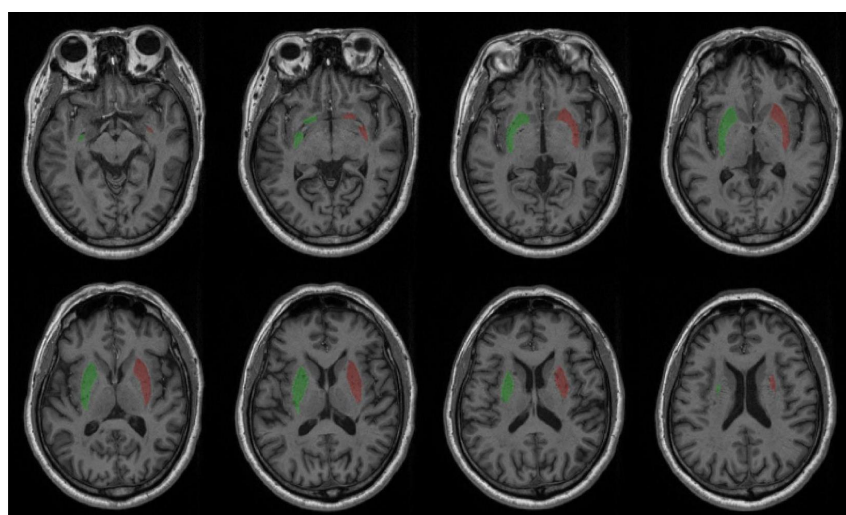

Subject 27     Putamen volume = 10.5ml     EQ = 48

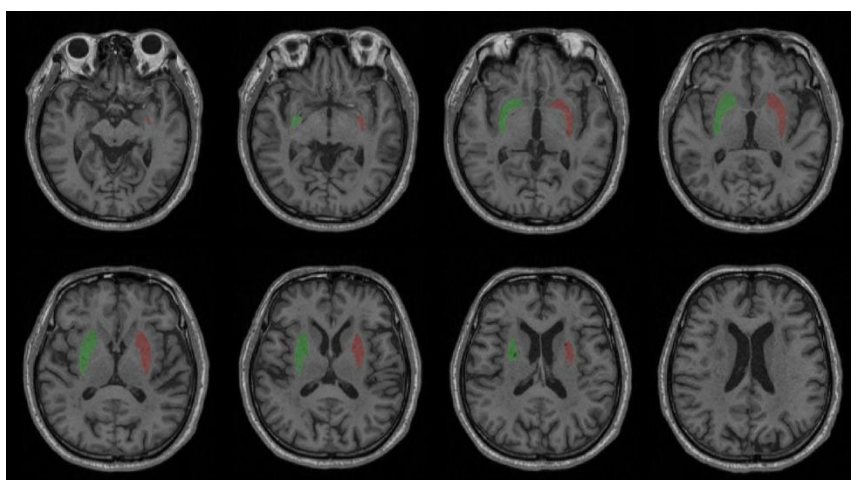

Subject 28    Putamen volume = 10.8ml    EQ = 52

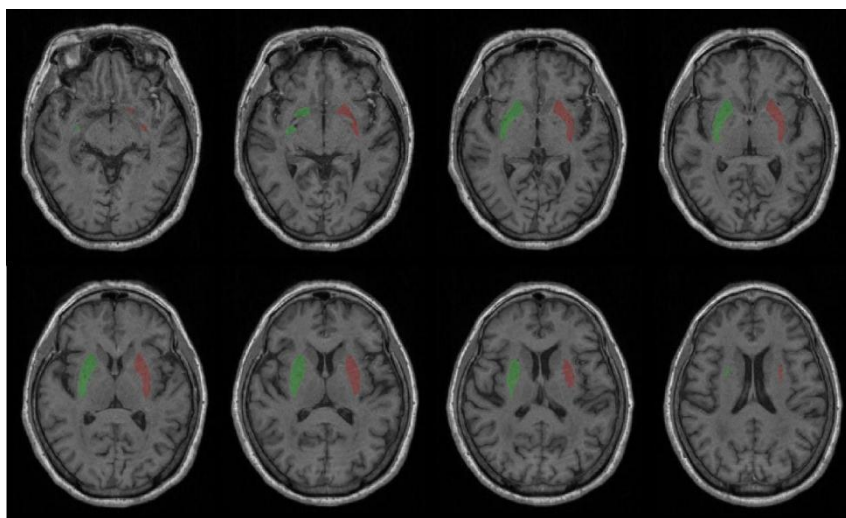

Subject 29    Putamen volume = 10.7ml    EQ = 26

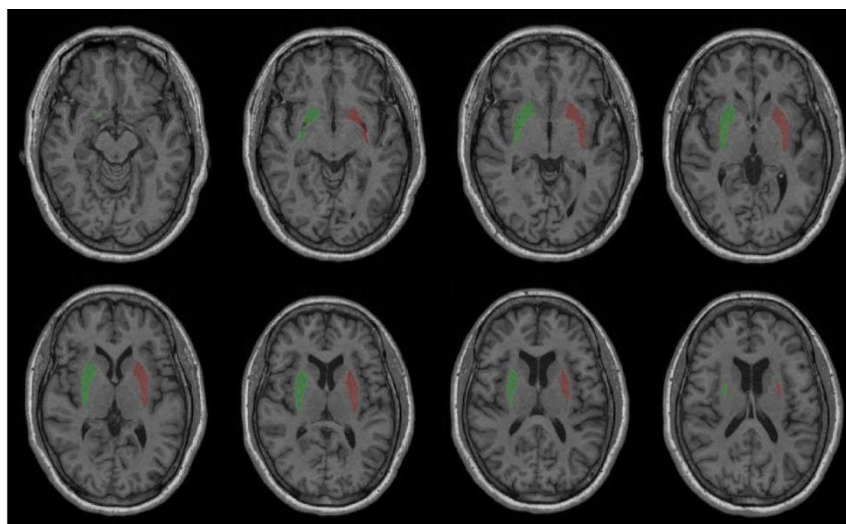

Subject 30    Putamen volume = 10.3ml    EQ = 16

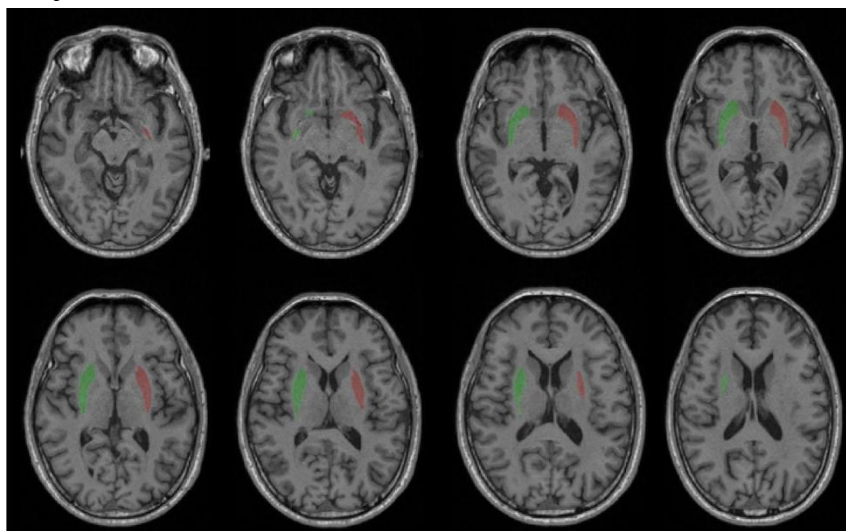

Subject 31    Putamen volume = 12.7ml    EQ = 36

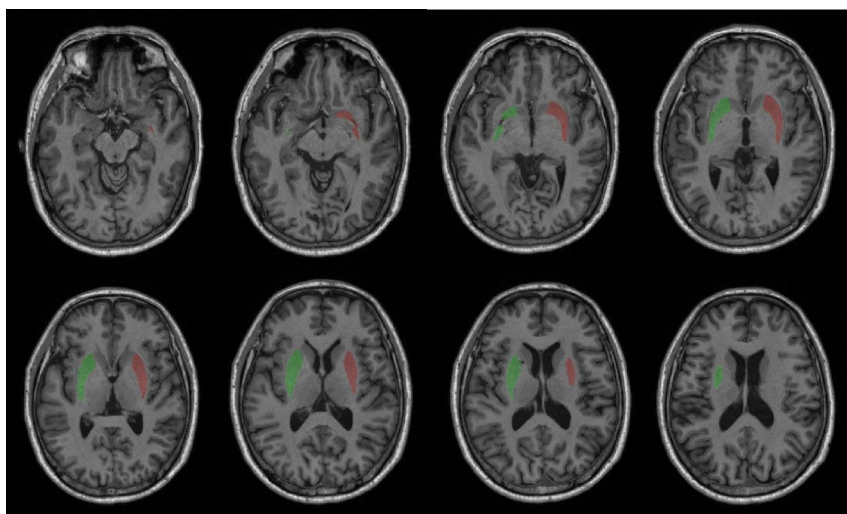

Subject 32    Putamen volume = 13ml    EQ = 33

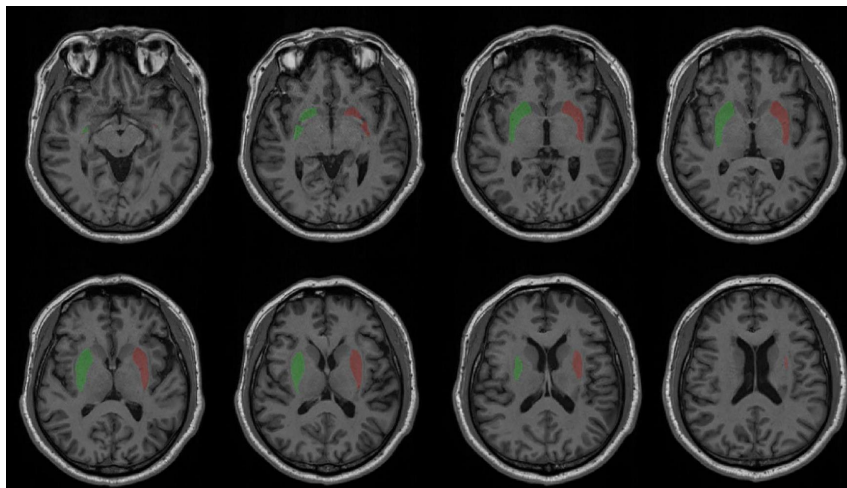

Subject 33    Putamen volume = 8.72ml    EQ = 35

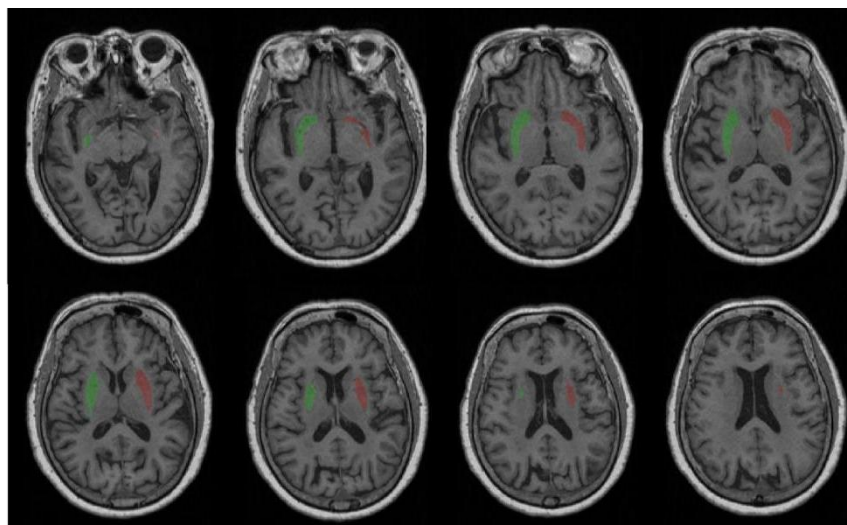



Subject 34    Putamen volume = 8.95ml    EQ = 32

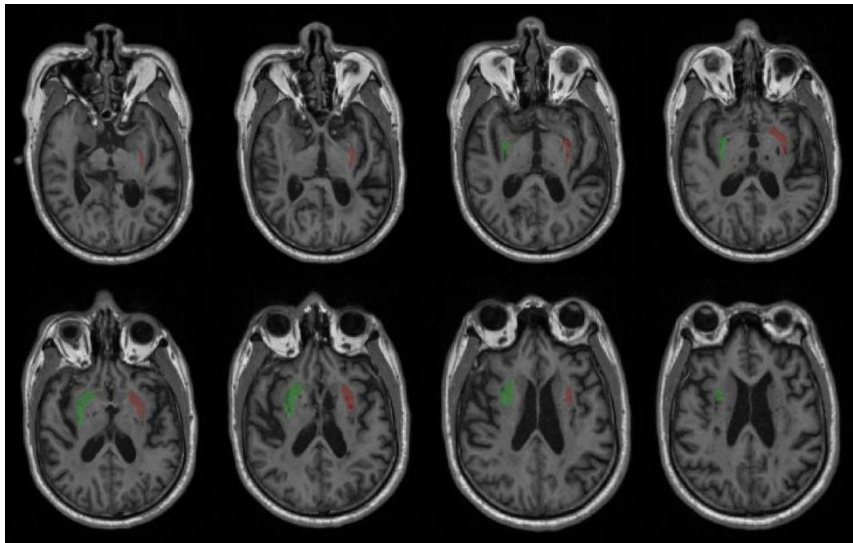

Subject 35    Putamen volume = 8.75ml    EQ = 34

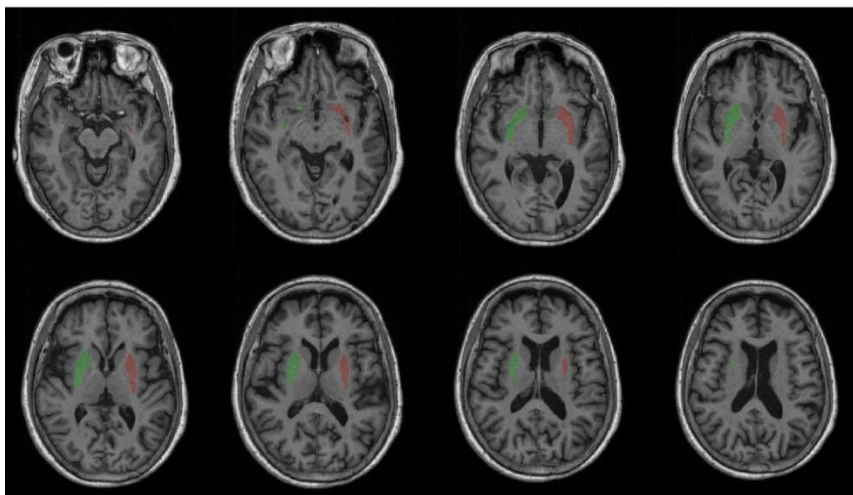

Subject 36    Putamen volume = 10.8ml    EQ = 51

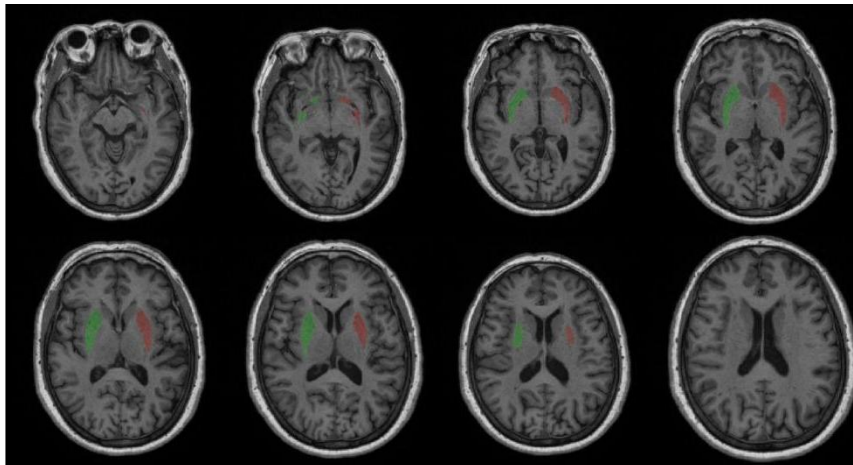

Subject 37 Putamen volume = 8.96ml EQ = 24

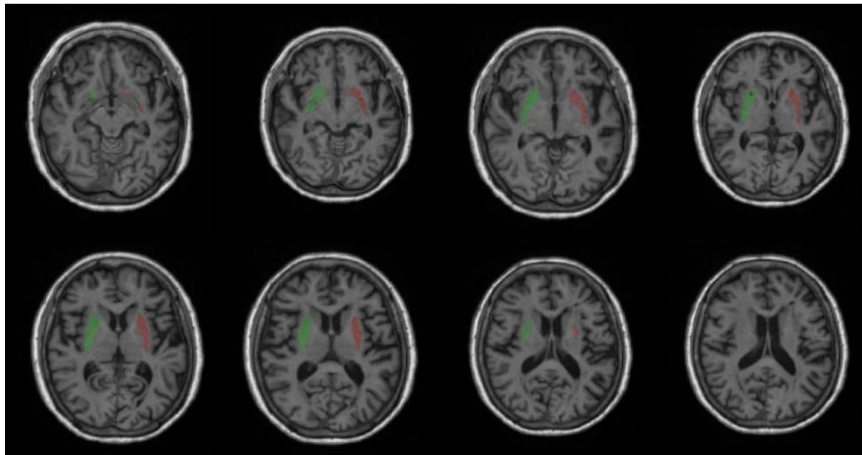

Subject 38 Putamen volume = 9.24ml EQ = 43

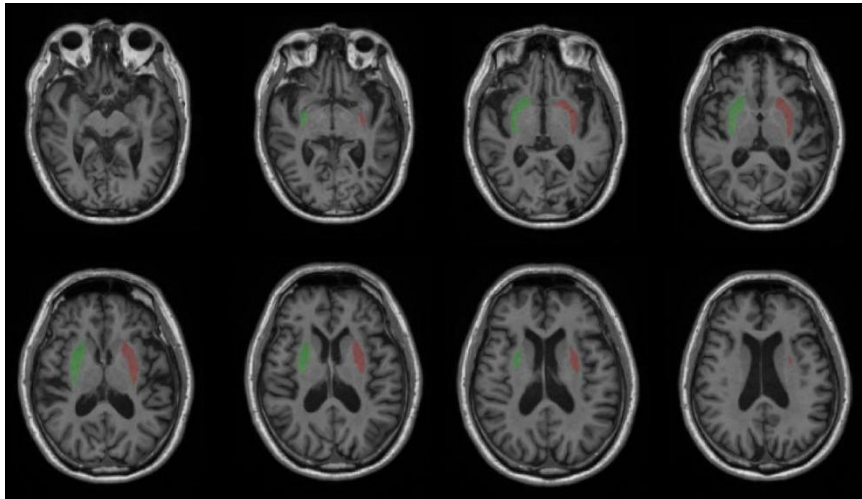

Subject 39 Putamen volume = 12ml EQ = 45

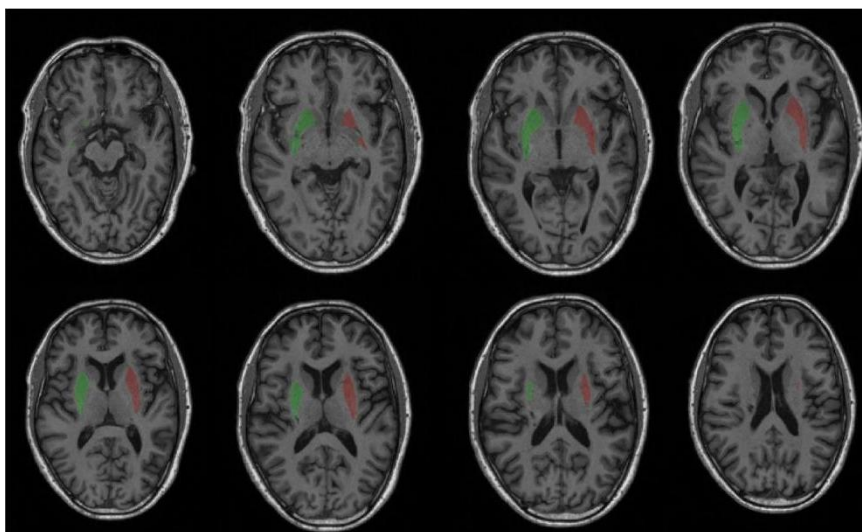

Subject 40    Putamen volume = 8.38ml    EQ = 20

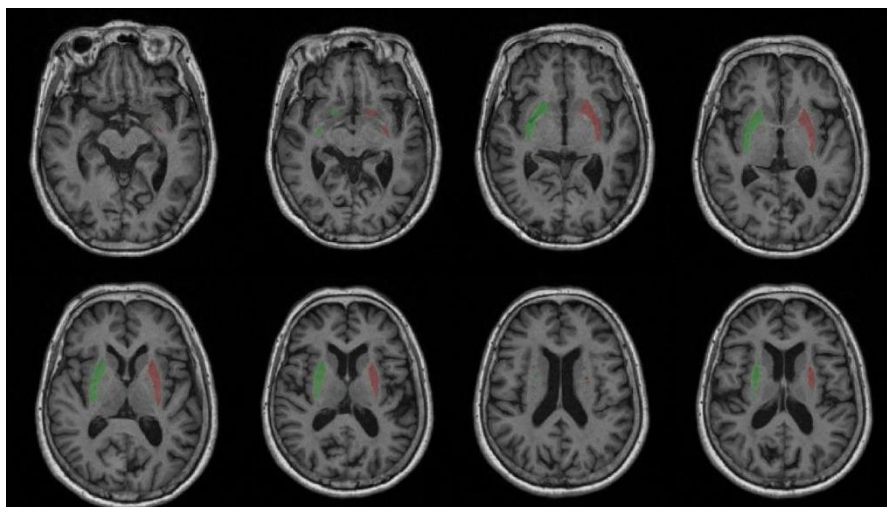

Subject 41    Putamen volume = 11.1ml    EQ = 37

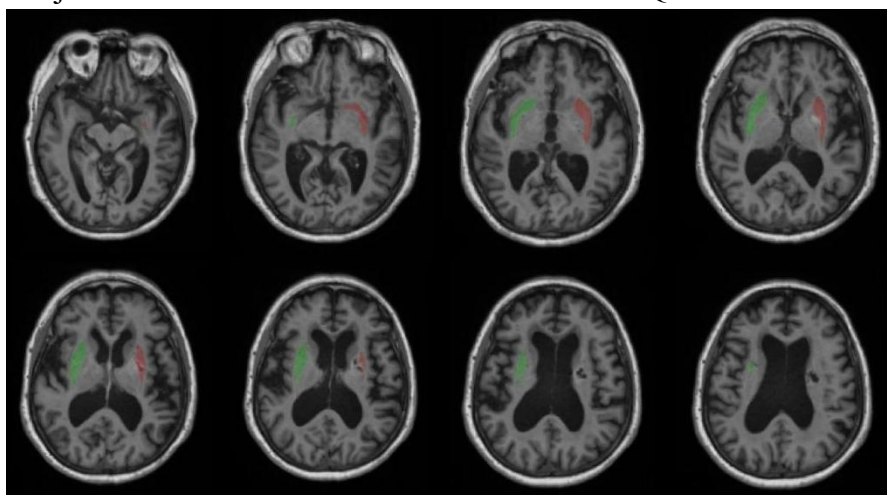

Supplement: s1 [file s1]
